# Supplementary material for: The psychosocial experiences of human papillomavirus (HPV) positive oropharyngeal cancer patients following (chemo)radiotherapy: A systematic review and meta‐ethnography
Source: PubMed Central journal article supplement (PMC10084069; doi:10.1002/pon.5984), 2022-07-05
Supplement: PON-31-2009-s003.pdf [file PON-31-2009-s003.pdf]

### Supplementary Information 3: Data Extraction table showing characteristics of the 23 selected papers

| First author, year, country              | Study Title                                                                                 | Study design                                                                 | Sample: total, % Oropharyngeal patients MF, age             | Treatment                                                                                | Sampling method and time point of data collection                                             | Method of data collection                                                                                   | Method of data analysis                                                                                                                             |
|------------------------------------------|---------------------------------------------------------------------------------------------|------------------------------------------------------------------------------|-------------------------------------------------------------|------------------------------------------------------------------------------------------|-----------------------------------------------------------------------------------------------|-------------------------------------------------------------------------------------------------------------|-----------------------------------------------------------------------------------------------------------------------------------------------------|
| 1. Semple et al (2010)<br>NI, UK         | Experience of parents with HNC who are caring for young children                            | Exploratory descriptive study                                                | 12 HNC, unspecified site, 10 M, all <59 yrs.                | 9 had radiotherapy, 4 + chemotherapy 5 + surgery, 3 had surgery only.                    | Purposive: diagnosis within 3 yrs. when had children aged 16 or under                         | Interviews with topic guide & open-ended questions                                                          | Cognitive mapping – modelling technique to show ideas, beliefs, values, and attitudes & their relationships to each other. 'How the world is seen'. |
| 2. Andersen and Jarden (2012)<br>Denmark | Coping with RT for HNC: a qualitative exploration                                           | Hermeneutic approach to interpretative study                                 | 5 HNC, includes oropharyngeal patient(s), 4 M, 50-65 yrs.   | All had radiotherapy                                                                     | Convenience: within one month of treatment                                                    | Semi-structured interviews with topic guide                                                                 | Thematic analysis with application of Lazarus & Folkman conceptual model of coping                                                                  |
| 3. Haisfield-Wolfe et al (2012)<br>USA   | Perspectives on coping among HNC patients receiving radiotherapy                            | Longitudinal descriptive study                                               | 21 HNC, 16 oropharyngeal patients (76%) 18 M, av. 59.2 yrs. | All had radiotherapy, 15 had concomitant chemotherapy.                                   | Convenience. 4 time points: Radiotherapy week 1, 5, 9 & 12                                    | Interviews with 3 open-ended questions                                                                      | Content analysis                                                                                                                                    |
| 4. Molassiotis and Rogers (2012)<br>UK   | Symptom experience and regaining normality in the first year following a diagnosis of HNC   | Longitudinal interpretative explanation                                      | 16 HNC, 14 oral and oropharyngeal 14 M, av. 61 yrs. 34-80   | 12 had radiotherapy, 4 had concomitant chemotherapy, 4 had surgery only. Half palliative | Purposive sampling for variation: 4 time points: diagnosis, 3, 6 (EOT) & 12 months            | Interviews: questions used for varied cancer sites & early responses informed questions at later interviews | Content analysis cross-sectionally and longitudinally                                                                                               |
| 5. Moore et al (2014)<br>Australia       | 'I have quality of life but...' Exploring support needs important to quality of life in HNC | Exploratory descriptive study of experiences throughout treatment trajectory | 8 HNC, 3 oropharyngeal = 38%. 7 M, 51-60 yrs. av. 60        | All had radiotherapy, 5 also had surgery.                                                | Snowball and convenience sampling from a support group. 1-8yrs after treatment, av.= 4.25yrs. | Semi-structured interviews with open-ended questions                                                        | Content analysis – inductive and directed using Lazarus & Folkman model of stress.                                                                  |

|                                          |                                                                                                        |                                                   |                                                                                        |                                                                         |                                                                                                |                                                               |                                                                                                           |
|------------------------------------------|--------------------------------------------------------------------------------------------------------|---------------------------------------------------|----------------------------------------------------------------------------------------|-------------------------------------------------------------------------|------------------------------------------------------------------------------------------------|---------------------------------------------------------------|-----------------------------------------------------------------------------------------------------------|
| 6. Schaller et al (2015)<br>Sweden       | Experiences of pain: a longitudinal study of HNC patients recently treated with radiotherapy           | Longitudinal descriptive study                    | 26 HNC, 9 (35%) oropharyngeal<br>19 M, av. 64 yrs.                                     | All had radiotherapy, 11 + chemotherapy + varied surgery                | Purposive sampling. 1 and 4-6 months after treatment                                           | 2 interviews – unstructured                                   | Content analysis                                                                                          |
| 7. McQuestion and Fitch (2016)<br>Canada | Patients' experiences of receiving RT for HNC: before, during & after treatment                        | Interpretative descriptive study                  | 17 HNC (mixed site not specified),<br>12 M, 15 <70 yrs.                                | All had radiotherapy, none had chemotherapy                             | Purposive sampling - subset of larger study.<br>3-4 months after radiotherapy                  | Interviews plus member checking with focus group (4)          | Thematic analysis (Giorgi '85)                                                                            |
| 8. Peeters et al (2018)<br>Netherlands   | Support needs of people with HNC regarding the disease and its treatment                               | Phenomenological study using conceptual framework | 13 HNC, 7 (54%) oropharyngeal<br>10 M, 48-73 years (median = 60)                       | All had radiotherapy, 9+ chemotherapy                                   | Purposive sampling: 7 for 2 focus groups & 6 interviews.<br>6 <12months after RT, 7<2yrs       | 2 Focus groups and 6 interviews                               | Direct content analysis using Dwarswaard et al '16 conceptual framework of Self-management support needs. |
| 9. Grattan et al (2018)<br>Canada        | Experiences of HNC in middle adulthood – consequences and coping                                       | Interpretative descriptive study                  | 10 middle aged HNC: 5 HPV+ve (& 4 untested)<br>9 M, <65yrs, median = 54                | All had radiotherapy, 8 with surgery.                                   | Purposive sampling. 2-19 months after treatment, median = 14                                   | Unstructured interviews                                       | Thematic analysis                                                                                         |
| 10. Dodd et al (2019)<br>UK              | Psychosocial impact of HPV HNC diagnosis on patients and their partners: a qualitative interview study | Descriptive study                                 | 20 HPV+ oropharyngeal patients (14 M) and 12 partners (2 M)<br>median age = 59, 41-83. | 18 had radiotherapy, 5 + chemotherapy<br>1 had surgery only             | Purposive sampling. 1 year after diagnosis, range = 12-53 months, av.= 23                      | Semi-structured interviews                                    | Thematic analysis – focused on the 12 patients & 5 partners aware of HPV+ve status                        |
| 11. Calver et al (2019)<br>UK            | How patients adjust psychologically to the experience of HNC: a grounded theory                        | Grounded theory                                   | 12 HNC, 4 (33.3%) oropharyngeal<br>inc.1 rec.<br>8 M, 35-72 yrs.<br>Av 58.75           | 8 had radiotherapy, 4+ chemotherapy.<br>1 at diagnosis, 3 surgery only. | Purposive and then theoretical sampling. Only 2 oropharyngeal patients treated within 2 years. | Semi-structured interviews – questions refined through study. | Analysis guided by Corbin & Strauss '15.                                                                  |

|                                       |                                                                                                                                      |                                           |                                                               |                                                      |                                                                                          |                            |                                                                        |
|---------------------------------------|--------------------------------------------------------------------------------------------------------------------------------------|-------------------------------------------|---------------------------------------------------------------|------------------------------------------------------|------------------------------------------------------------------------------------------|----------------------------|------------------------------------------------------------------------|
| 12. McQuestion et al (2011)<br>Canada | Changed meaning of food – physical emotional social loss for patients having received HNC radiation treatment                        | Interpretative descriptive study          | 17 HNC (mixed site not specified), 12 M, 15 <70 yrs.          | All had radiotherapy, none had chemotherapy.         | Purposive sampling - subset of larger study. 3-4 months after radiotherapy               | Interviews                 | Thematic analysis (Giorgi '85)                                         |
| 13. Ottosson et al (2013)<br>Sweden   | The experience of food, eating and meals after RT for HNC                                                                            | Descriptive study                         | 13 HNC, 6 (46%) oropharyngeal 11 M, median 60 yrs. 47-70      | All had radiotherapy, none had chemotherapy.         | Purposive sampling. 8-11 months after RT - with reflection on early post RT              | Semi-structured interviews | Content analysis                                                       |
| 14a. Nund et al (2014a)<br>Australia  | Survivors' experiences of dysphagia-related services following HNC: Implications for clinical practice                               | Descriptive with phenomenological aspects | 24 HNC, 18 (75%) oropharyngeal (14 HPV+ve), 20 M, 18 <65 yrs. | 23 had chemo-radiotherapy, 1 had radiotherapy alone. | Purposive sampling: have dysphagia. Av = 18 months after treatment -range 1-60mo, 5< 3mo | Semi-structured interviews | Thematic analysis                                                      |
| 14b. Nund et al (2014b)<br>Australia  | Lived experience of dysphagia following non-surgical treatment for HNC                                                               | As above                                  | As above                                                      | As above                                             | As above                                                                                 | As above                   | As above                                                               |
| 15. Charalambous (2014)<br>Cyprus     | Hermeneutic phenomenological interpretations of HNC patients experiences living with radiation-induced xerostomia: the price to pay? | Hermeneutic phenomenology                 | 15 HNC, (site not specified) 8 M, 39-66 yrs. (av. 54)         | All had radiotherapy                                 | Purposive sampling: including assessment of xerostomia. 3 months after treatment         | Unstructured interviews    | Thematic analysis and hermeneutic phenomenological structural analysis |

|                                     |                                                                                                         |                                                        |                                                                                                   |                                                       |                                                                                                                             |                                                 |                   |
|-------------------------------------|---------------------------------------------------------------------------------------------------------|--------------------------------------------------------|---------------------------------------------------------------------------------------------------|-------------------------------------------------------|-----------------------------------------------------------------------------------------------------------------------------|-------------------------------------------------|-------------------|
| 16. Brockbank et al (2015)<br>UK    | Pre-treatment Information on Dysphagia: Exploring the views of HNC patients                             | Descriptive study of service experience                | 24 HNC (site not given)<br>22 M, median 59 yrs. (44-77)                                           | All had chemo-radiotherapy                            | Purposive sampling: had dysphagia. Av. 10 months, 2-22 months after treatment                                               | Focus groups (11) and interviews (13)           | Thematic analysis |
| 17. Patterson et al (2015)<br>UK    | HNC patients' perceptions of swallowing following chemo-radiotherapy                                    | 2 stages: Ethnographic observation & descriptive study | 12 + 9 HNC, 39% oropharyngeal ( <i>approx. from larger study</i> ).<br>18 M, age 45-77 median 63. | All had radiotherapy, 17 also had chemotherapy.       | Purposive sampling from larger study: presence of dysphagia. 3-18 months after treatment                                    | Observations and interviews                     | Thematic analysis |
| 18. Ehrsson et al (2015)<br>Sweden  | HNC perceptions of QOL and how it is affected by the disease and enteral tube feeding during treatment. | Longitudinal descriptive study                         | 36 HNC, 16 (39%) oropharyngeal<br>28 M, av. 62.3 yrs.                                             | All had radiotherapy, 13 + chemotherapy, 12 + surgery | Purposive sampling. Pre-radiotherapy and 2 weeks & 3 months after treatment                                                 | Structured interviews, using QoL questionnaire. | Content analysis  |
| 19. Williams et al (2019)<br>UK     | Patients' experience of enteral feeding following chemo-radiotherapy for HNC: a qualitative study       | Interpretative descriptive study                       | 10 HNC, 8 (80%) oropharyngeal<br>8 M, median 54, yrs. 43-65                                       | All had radiotherapy, 9 + chemotherapy                | Purposive sampling: presence of feeding tubes. Median 26 days after treatment, range 3-231 days, 9 patients within 12 weeks | Semi structured interviews                      | Thematic analysis |
| 20. Sandmael et al (2019)<br>Norway | Nutritional experiences in HNC                                                                          | Descriptive study                                      | 10 HNC, 7 (70%) oropharyngeal<br>5 M, median 59 yrs. 49 – 70                                      | All had radiotherapy                                  | Purposive sampling: from a supportive nutrition rehab intervention pilot study. 2-4 weeks after treatment                   | Semi structured interviews                      | Content analysis  |

|                                        |                                                                                                                        |                                                              |                                                                    |                                                             |                                                                                                     |                                                                                             |                   |
|----------------------------------------|------------------------------------------------------------------------------------------------------------------------|--------------------------------------------------------------|--------------------------------------------------------------------|-------------------------------------------------------------|-----------------------------------------------------------------------------------------------------|---------------------------------------------------------------------------------------------|-------------------|
| 21. McGarvey et al (2014)<br>Australia | Lymphoedema following treatment for HNC: impact on patients, and beliefs of HCPs                                       | Interpretative descriptive study of patients and HCP beliefs | 10 HNC, 5 oropharyngeal 8 M, av. 60.1 yrs. 32–75 and 10 HCPs.      | All had radiotherapy, 5 non-oropharyngeal + neck dissection | Purposive sampling: presence of lymphoedema. Most around 12 months after treatment, all <18 months. | Interviews with open and closed questions                                                   | Thematic analysis |
| 22. Jeans et al (2018)<br>Australia    | Patient perceptions of living with head and neck lymphoedema and the impacts to swallowing, voice and speech function. | Interpretative descriptive study                             | 12 HNC, 7 (58%) oropharyngeal (6 HPV+ve), 8 M, av. 61.3 yrs. 52–72 | All had chemo-radiotherapy, 6 + neck dissection             | Purposive sampling: presence of lymphoedema. 3-22 months (av. 8.4) after treatment                  | Semi structured interviews. Patients had questions beforehand, mixed face to face and phone | Thematic analysis |
